# Supplementary material for: MMP1 acts as a potential regulator of tumor progression and dedifferentiation in papillary thyroid cancer
Source: Front Oncol. 2022 Nov 21;12:1030590. doi: 10.3389/fonc.2022.1030590 (PMC9720150; doi:10.3389/fonc.2022.1030590)
Supplement: Supplementary file 3 [file Table_2.xlsx]

## Sheet: Sheet 1
Ontology	ID	Description	GeneRatio	BgRatio	pvalue	p.adjust	qvalue	geneID	Count	zscore
BP	GO:0140014	mitotic nuclear division	25/313	264/18670	2.96e-12	1.01e-08	8.90e-09	ANLN/DLGAP5/CDC20/TRIP13/NUF2/AURKA/NEK2/TGFA/TPX2/BIRC5/KIF23/BUB1/NCAPG/UBE2C/TTK/CENPF/KIF14/KIF4A/MAD2L1/PRC1/NUSAP1/BMP7/CHMP4C/CENPE/BUB1B	25	3.8
BP	GO:0030198	extracellular matrix organization	28/313	368/18670	2.79e-11	3.29e-08	2.88e-08	MMP1/CDH1/GREM1/PTX3/NPNT/ITGA9/MMP12/COL4A3/SERPINE1/PDPN/LOX/ADAM12/COL8A1/COL6A1/ADAMTS2/PXDN/MMP9/MMP13/WT1/VCAN/LOXL2/ADAM19/COL5A2/SPINT1/POSTN/COL4A4/COL5A1/COL12A1	28	2.64575
BP	GO:0043062	extracellular structure organization	30/313	422/18670	2.88e-11	3.29e-08	2.88e-08	MMP1/CDH1/GREM1/PTX3/NPNT/ITGA9/MMP12/COL4A3/SERPINE1/LIPG/PDPN/LOX/ADAM12/COL8A1/COL6A1/BMP7/ADAMTS2/PXDN/MMP9/MMP13/WT1/VCAN/LOXL2/ADAM19/COL5A2/SPINT1/POSTN/COL4A4/COL5A1/COL12A1	30	2.19089
CC	GO:0005819	spindle	24/325	347/19717	3.78e-09	1.35e-06	1.12e-06	DLGAP5/ASPM/FAM110C/CDC20/SHCBP1/AURKA/NEK2/TPX2/FAM83D/BIRC5/KIF23/KIF20A/TTK/CENPF/KIF14/KIF4A/MAD2L1/PRC1/KIF15/NUSAP1/MTCL1/BEX4/CENPE/BUB1B	24	4.08248
CC	GO:0070160	tight junction	14/325	128/19717	2.65e-08	2.67e-06	2.22e-06	TACSTD2/EPCAM/CLDN3/OCLN/EPB41L4B/CLDN1/CXADR/CLMP/CLDN10/ILDR1/CLDN8/MARVELD2/MPP7/PARD6B	14	-3.20713
CC	GO:0016328	lateral plasma membrane	10/325	57/19717	2.80e-08	2.67e-06	2.22e-06	TACSTD2/CDH1/EPCAM/CLDN3/OCLN/GJB2/CLDN1/ERBB3/DMD/MTCL1	10	-1.89737
MF	GO:0005201	extracellular matrix structural constituent	14/311	163/17697	1.15e-06	5.88e-04	5.30e-04	TFPI2/NPNT/COL4A3/CTHRC1/SRPX2/COL8A1/COL6A1/PXDN/VCAN/COL5A2/POSTN/COL4A4/COL5A1/COL12A1	14	1.60357
MF	GO:0030020	extracellular matrix structural constituent conferring tensile strength	7/311	41/17697	6.51e-06	0.002	0.001	COL4A3/COL8A1/COL6A1/COL5A2/COL4A4/COL5A1/COL12A1	7	0.377964
MF	GO:0004601	peroxidase activity	7/311	52/17697	3.29e-05	0.006	0.005	DUOX2/IYD/DUOX1/TPO/PXDN/GPX3/MGST1	7	-1.88982
